# Supplementary material
Source: publisher figshare collection journal article supplement (https://karger.figshare.com/ndownloader/files/38923577)
Supplement: Supplementary file 1 [file 38923577]

**Supplement 1**

|  | New system =123 | | p | T piece n=122 | | p |
| --- | --- | --- | --- | --- | --- | --- |
| Breathers n=82 | Intubated  N=41 | Breathers  N=67 | Intubated  N=55 |
| GA,mean(SD), weeks | 26.14(1.20) | 25.25(1.3) | **<0.001** | 26.10(1.28) | 25.06(1.21) | **<0.001** |
| Multiple pregnancy,  Twins, n(%)  Triplets, n(%) | 16(19.51)  0(0) | 10(24.39)  0(0) | 0.64 | 12(17.91)  1(1.49) | 8(14.55)  2(3.64) | 0.71 |
| Female | 40(48.78) | 21(51.22) | 0.80 | 35(52.24) | 31(56.36) | 0.65 |
| Birthweight, mean(SD)g | 846.1(192.9) | 716.8(156.0) | **<0.001** | 863.0(195.8) | 722.3(145.4) | **<0.001** |
| Antenatal steroids | 69(84.15)  13(15.85) | 31(75.61)  9(21.95) | 0.24 | 57(85.07)  10(14.93) | 43(78.18)  11(20.0) | 0.398 |
| Caesaren delivery | 60(73.17) | 27(65.85) | 0.40 | 45(67.16) | 32(58.18) | 0.31 |
| General anesthesia | 4(4.88) | 10(24.39) | **0.002** | 1(1.49) | 5(9.09) | 0.09 |
| Caeseran sectio for fetal concern | 36(43.90) | 19(46.34) | 0.80 | 30(44.78) | 22(40.0) | 0.60 |
| Mother in active labor |  |  |  |  |  |  |
| Clinical choriomanionatis | 22(26.83) | 9(21.95) | 0.56 | 16(23.88) | 18(32.73) | 0.28 |
| Pre eclampsia/Eclampsia | 19(23.17) | 9(21.95) | 0.88 | 16(23.88) | 4(7.27) | **0.014** |
| PPROM | 26(31.71) | 13(31.71) | 1.00 | 22(32.84) | 18(32.71) | 0.99 |
| Ablatio | 12(14.63) | 3(7.32) | 0.38 | 7(10.45) | 10(18.18) | 0.30 |

**Table 1:** Comparisons of background for intubated vs non-intubated in the whole CORSAD cohort

**Table 2:** Risk difference for the whole cohort in the CORSAD trial

|  | **New system (123)** | **T piece(122)** | **%RD (95%CI)** | **P value** |
| --- | --- | --- | --- | --- |
| PPV at all, n(%) | 102 (82.9) | 103(84.4) | -1.5(-10.8 to 7.7) | 0.75 |
| PPV after 5 min, n (%) | 45(36.6) | 61(50.0) | -13.4(–25.7 to -1.1 ) | **0.03** |
| PPV repeatedly, n(%) | 29 (23.6) | 46 (37.7) | -14.1( -25.5 to-2.7) | **0.01** |
| SpO2 >=85% at 5 min, n(%) | 53(43,1) | 39(32,0) | -11.1(-23 to 0.9) | 0.07 |
| SpO2 >=90% at 10 min n(%) | 98(79,7) | 91(74,59) | -5(-15.6 to 5) | 0.34 |
